# Supplementary material for: Room-temperature cyclometallation of amines, imines and oxazolines with [MCl2Cp*]2(M = Rh, Ir) and [RuCl2(p-cymene)]2
Source: Royal Society of Chemistry journal article supplement (doi:10.1039/b303737a), 2003-01-01

SUPPLEMENTARY MATERIAL

This consists of characterisation and crystallographic data for[IrCl2(NH2Ph)Cp*] (**6**), and Figures showing the structures of **3b**, **5b** and **6**. Crystallographic data for 3b and 5b are in the main manuscript.

Characterisation data for [IrCl2(NH2Ph)Cp*] (**6**)

1H NMR  1.41 (s, 15H, Cp*), 5.35 (br, 2h, NH2), 7.11 (t, 1H, *J* 7.5, Ph), 7.19 (d, 2H, *J* 7.5, Ph), 7.33 (t, 2H, *J* 7.5, Ph)

MS(FAB) *m*/*z*. 491 [M]+.

Crystallographic data for **6**

| Identification code | **6** |
| --- | --- |
| Empirical formula | C16H22Cl2IrN |
| Formula weight | 491.45 |
| Crystal system | Triclinic |
| Space group | P-1 |
| a/ Å | a = 7.5167(11) Å |
| b/ Å | b = 9.2870(17) Å |
| c/ Å | c = 12.9825(18) Å |
| α° | 96.389(3) |
| β° | 93.043(2) |
| γ° | 113.270(2) |
| U/ Å3 | 822.7(2) Å3 |
| Z | 2 |
| Absorption coefficient mm-1 | 8.429 |
| F(000) | 472 |
| Crystal size/ mm | 0.21 x 0.15 x 0.06 |
| Reflections collected | 5775 |
| Unique reflections (Rint) | 3126 (0.1152) |
| Data / restraints / parameters | 3126 / 0 / 186 |
| Goodness-of-fit on F2 | 1.073 |
| *R*1 indices [I>2σ(I)] | 0.0446 |
| *wR*2 (all data) | 0.1217 |
| Largest diff. peak and hole | 3.572 and -2.874 e.Å-3 |
|  |  |

Molecular structure and atom numbering scheme for **3b** with 50% displacement ellipsoids and all H atoms omitted for clarity.

Molecular structure and atom numbering scheme for **5b** with 50% displacement ellipsoids and all H atoms omitted for clarity.

Molecular structure and atom numbering scheme for **6** with 50% displacement ellipsoids and all H atoms omitted for clarity.


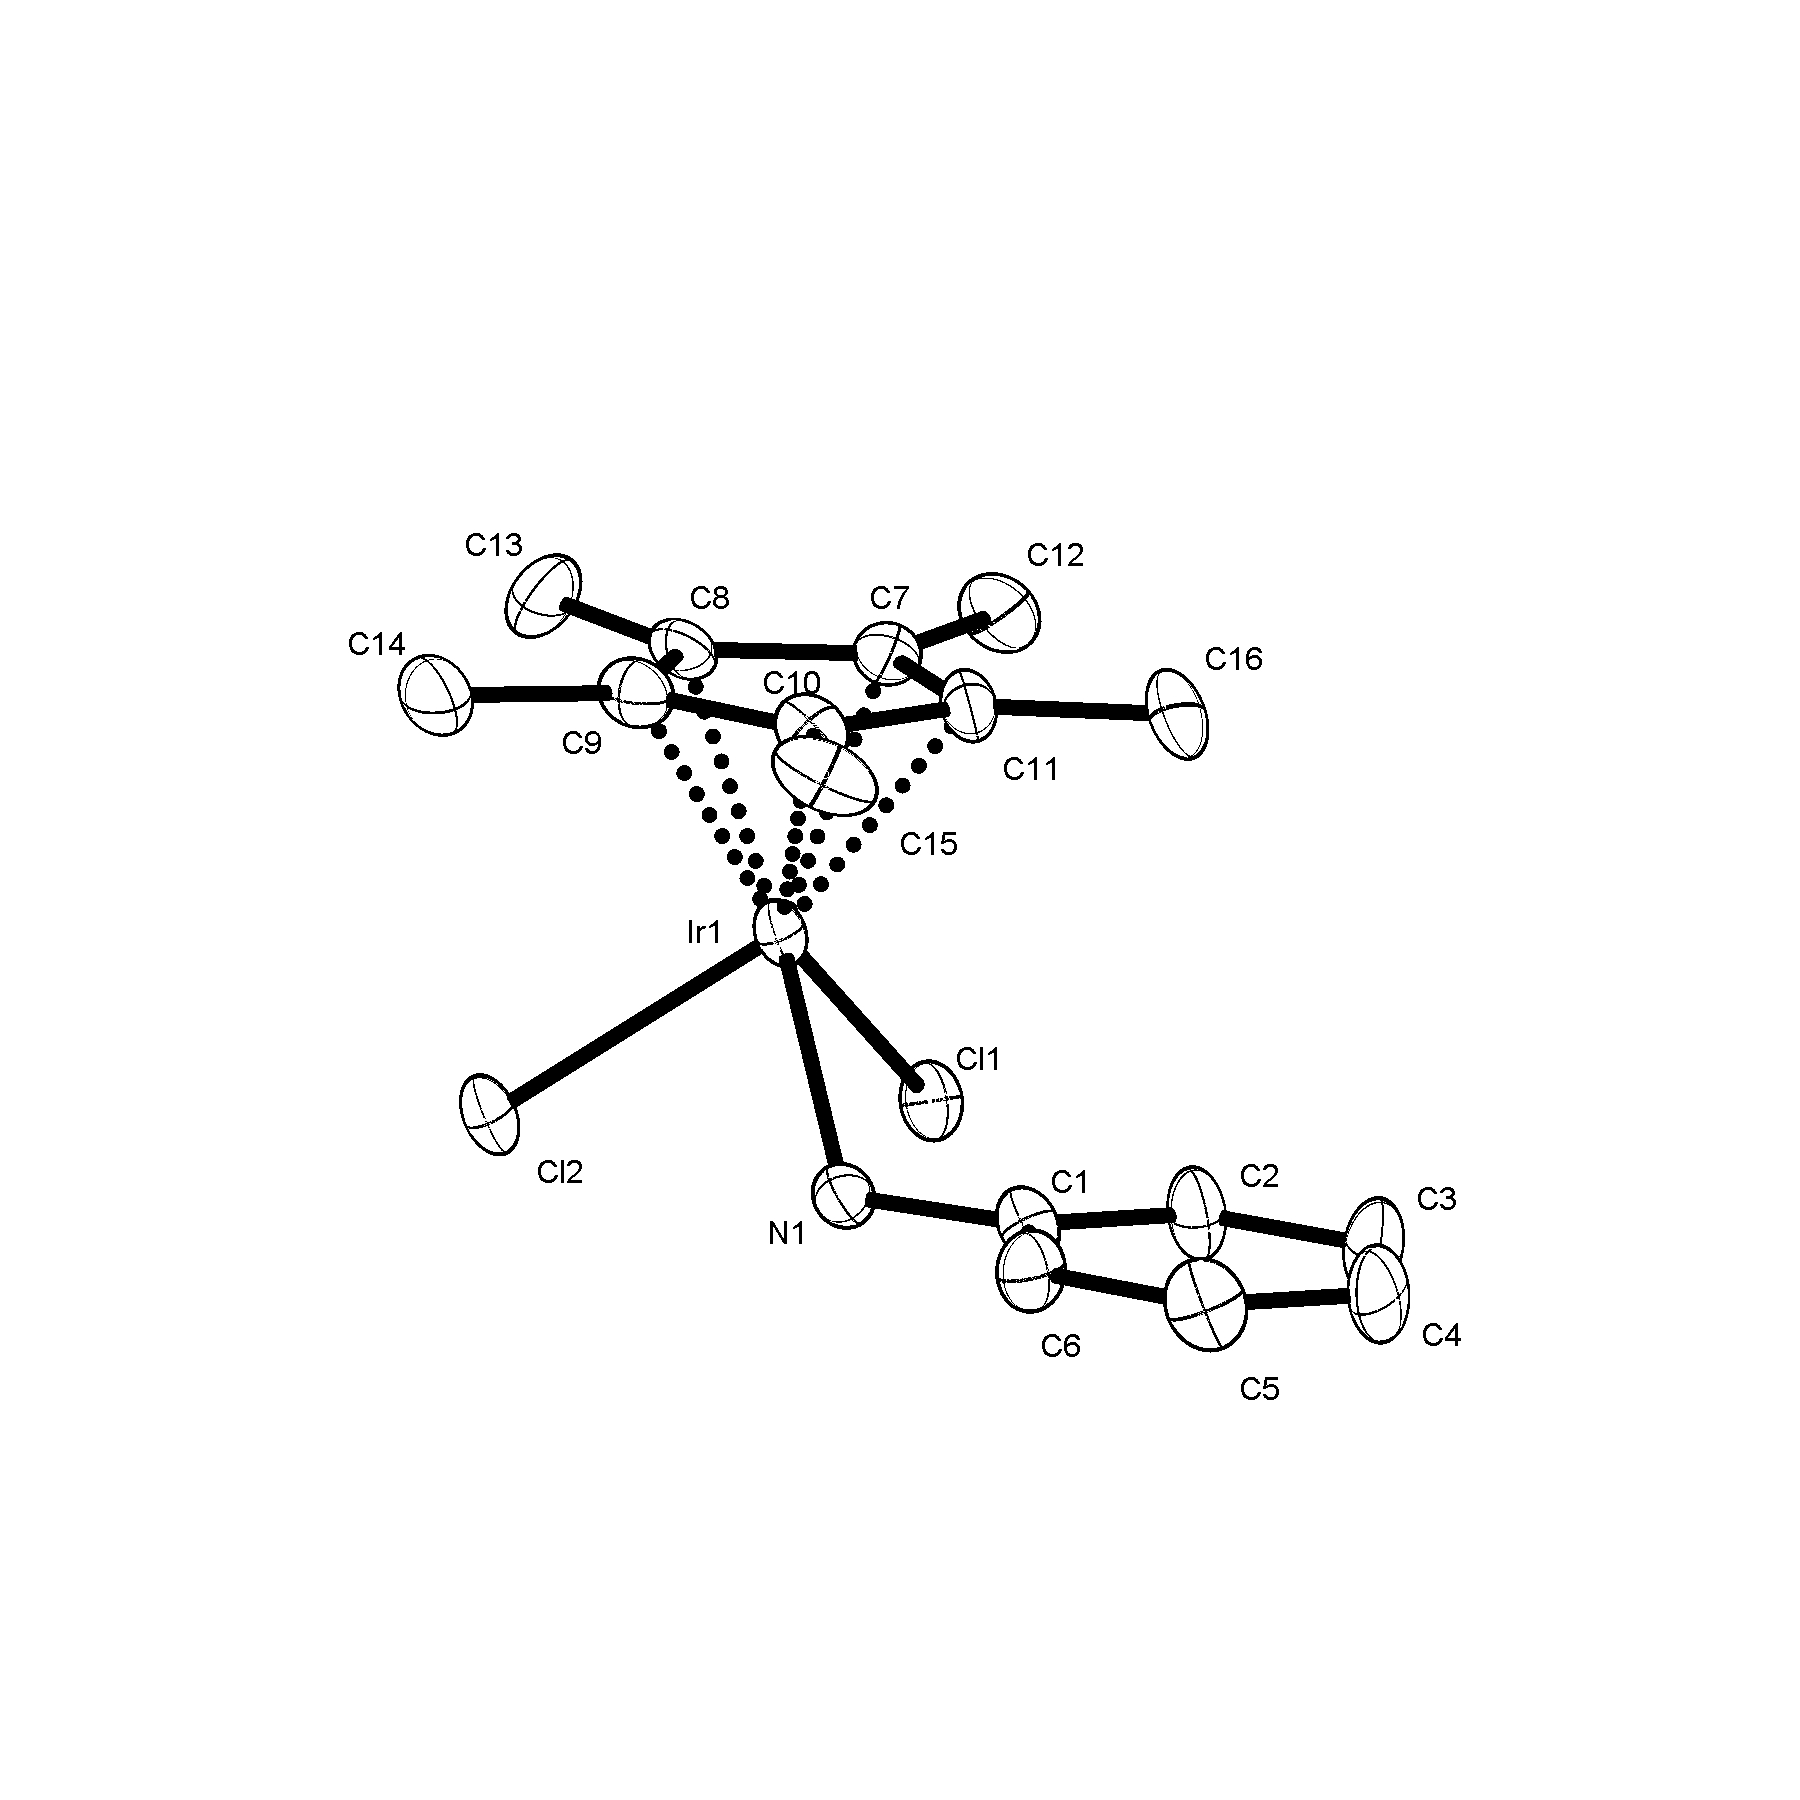

Supplement: b303737a.doc [file b303737a.doc]
